# Supplementary material for: NiSe2 nanooctahedra as anodes for high-performance sodium-ion batteries
Source: Royal Society of Chemistry journal article supplement (doi:10.1039/c9nj02631b), 2019-01-01
Supplement: c9nj02631b1.pdf [file c9nj02631b1.pdf]

## *Supporting Information*

### **NiSe<sub>2</sub> nanooctahedra as anodes for high performance sodium-ion batteries**

Siwei Fan,<sup>a</sup> Guangda Li,<sup>\*a</sup> Gai Yang,<sup>b</sup> Xu Guo<sup>a</sup> and Xinhuan Niu<sup>a</sup>

<sup>a</sup> School of Materials Science and Engineering, Qilu University of Technology

(Shandong Academy of Sciences), Jinan 250353, China

<sup>b</sup> Energy Research Institute of Shandong Academy Science, Qilu University of

Technology (Shandong Academy of Science), Jinan 250353, China

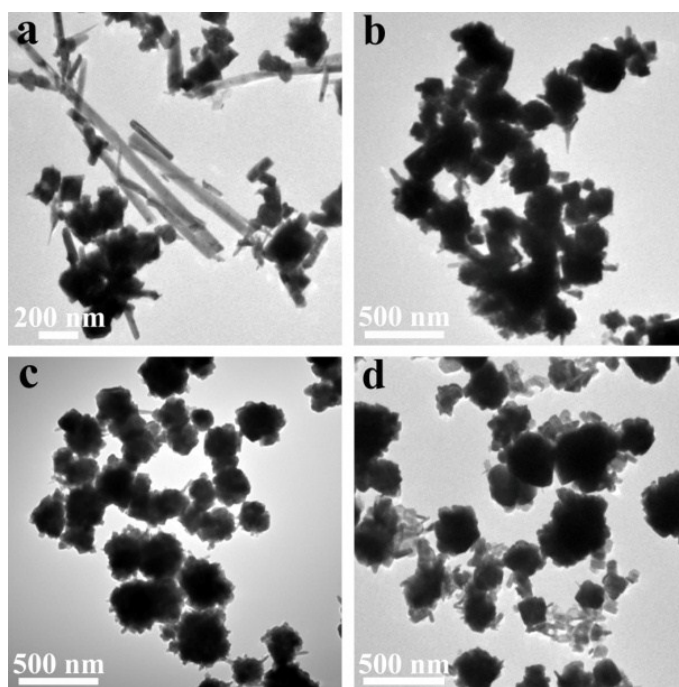

**Figure S1.** TEM images of NiSe<sub>2</sub>-NP under different NaOH concentration: (a) 1 M, (b) 2 M, (c) 4 M, (d) 6 M.

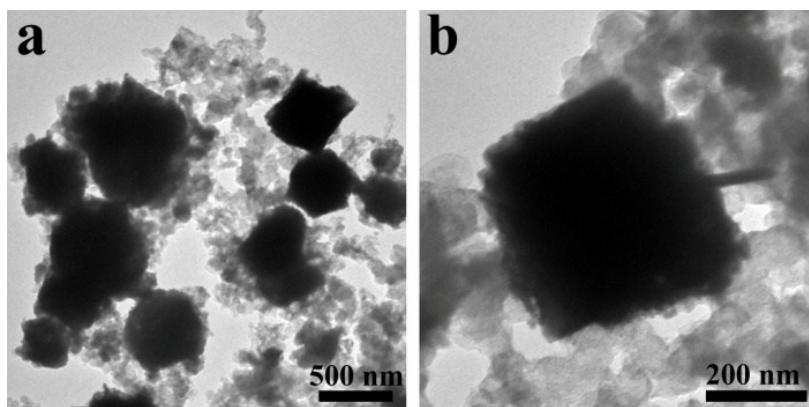

**Figure S2.** The TEM images of NiSe<sub>2</sub>-NO after first tens cycles.

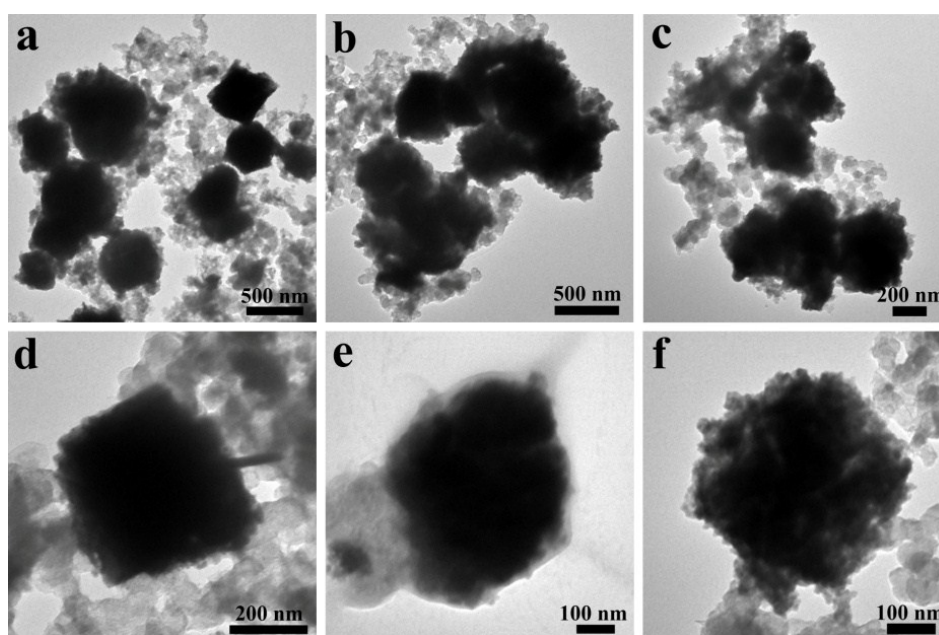

**Figure S3.** The TEM images of NiSe<sub>2</sub>-NO after 10 cycles (a, d), 100 cycles (b, e),  
500 cycles (c, f).

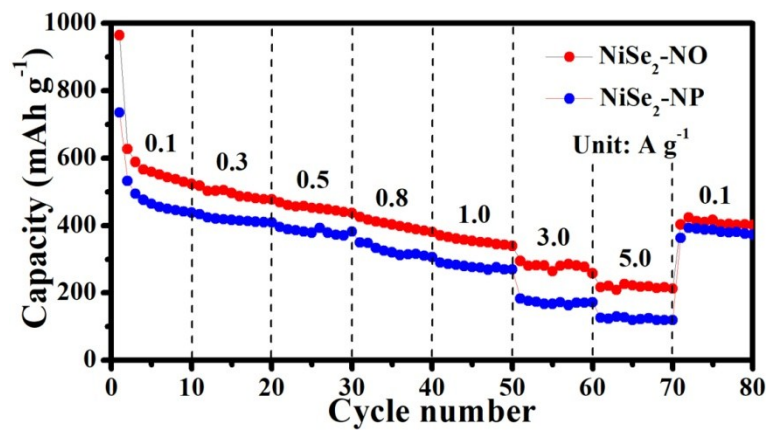

**Figure S4.** The rate capability of NiSe<sub>2</sub>-NO and NiSe<sub>2</sub>-NP.
